# Supplementary material
Source: Elsevier journal article supplement (https://www.sciencedirect.com/science/article/pii/S2530018020301219)
Supplement: mmc1 [file S2530018020301219:mmc1.docx]

ANEXO 1. Resto de investigadores del estudio ISCCE-EyN

Albacete

- Francisco Botella Romero
- Silvia Aznar Rodríguez
- Lourdes García Blasco
- Cristina Lamas Oliveira
- Luz María López Jiménez
- Jose Juan Lozano García
- Pedro José Pinés Corrales

Alcázar de San Juan-Tomelloso

- Francisco Javier Gómez Alfonso
- Julia Silva Fernández
- Amparo Lomas Meneses
- María López Iglesias
- Florentino del Val Zaballos

Ciudad Real

- Miguel Aguirre Sánchez-Covisa
- Belén Fernández de Bobadilla
- Álvaro García Manzanares Vázquez de Agredos
- Carlos Roa Llamazares
- Pedro Rozas Moreno

Cuenca

- Mubarak Alramadan Aljamalah
- David Martín Iglesias
- Javier González López

Guadalajara

- Visitación Alvarez de Frutos
- Marta Cano Mejías
- Enrique Costilla Martín
- Sandra Herranz Antolín

Talavera

- Benito Blanco Samper
- Petra de Diego Poza
- Iván Quiroga López
- Miguel Ángel Valero González

Toledo

- Bárbara Cánovas Gaillemin
- Enrique Castro Martínez
- Inés Luque Fernández
- Amparo Marco Martínez
- Julia Sastre Marcos
- Almudena Vicente Delgado

Villarrobledo

- María Olmos Alemán
- Rosa Pilar Quílez Toboso

Hospitales de la Comunidad de Madrid

- Elena Carrillo Lozano
- Isabel Huguet Moreno

Anexo 2. Abreviaturas usadas en los gráficos

Cán. tir. sin pers/recid: Cáncer de tiroides sin persistencia/recidiva

Cán. tir. con pers/recid: Cáncer de tiroides con persistencia/recidiva

DM 1 sin compl.: Diabetes mellitus tipo1 sin complicaciones

DM 1 con compl.: Diabetes mellitus tipo1 con complicaciones

DM 1 con ICSI: Diabetes mellitus tipo 1 con infusión continua de insulina subcutánea

DM 2 sin compl.: Diabetes mellitus tipo2 sin complicaciones

DM 2 con compl.: Diabetes mellitus tipo 2 con complicaciones

MEN1: Síndrome de neoplasias endocrinas múltiples tipo 1

MEN2: Síndrome de neoplasias endocrinas múltiples tipo 2

Nód. tir. hiperf.: Nódulo(s) tiroideos(s) hiperfuncionante(s)

Otros tum. neuroend. no MEN: Otros tumores neuroendocrinos no MEN

Sobrep./obes. sin compl.: Sobrepeso/obesidad sin complicaciones

Material suplementario

Instrucciones dadas en primera ronda

1. Para asignar un índice de complejidad, compara cada diagnóstico con algo muy sencillo para nosotros, que es la revisión de un hipotiroidismo primario, a lo que se da un valor 10
2. Si algo te parece el doble de difícil/complicado/demandante de tiempo que la revisión de un hipotiroidismo habrá que darle un valor 20 (es decir, algo que demande el mismo tiempo que una revisión de hipotiroidismo pero que exija estar mejor formado, estudiar más, puntuá más).
3. La puntuación máxima es 100, que correspondería a un caso excepcionalmente complejo.
4. Evidentemente, no todos los hipotiroidismos son iguales, no es lo mismo tener que ajustar la dosis o no, etc; pero piensa en el hipotiroidismo “medio”, en la diabetes mellitus tipo 1 “media”, etc, a la hora de hacer tu valoración.
5. Se adjunta una hoja de cálculo de Libre Office con una serie de diagnósticos que podemos ver en la consulta de Endocrinología y Nutrición, para que puntúes la complejidad, comparando con una revisión de hipotiroidismo. Se incluye una columna de paciente nuevo y otra de revisiones, pero la comparación siempre es con la revisión del hipotiroidismo. Es decir, la complejidad de una primera visita de lo que sea se compara también con la revisión del hipotiroidismo y su índice 10.
6. Aquellos diagnósticos que no veas nunca en consulta déjalos en blanco.

Instrucciones dadas en segunda ronda

1. En la hoja de cálculo que has recibido aparecen, por una parte, tus contestaciones en la primera ronda, y al lado, con fondo coloreado la contestación de grupo. La contestación del grupo es la mediana de lo que hemos respondido los distintos participantes a cada ítem.
2. A la derecha de las contestaciones del grupo aparecen las celdas vacías donde debes contestar esta segunda ronda (la celda de revisión de hipotiroidismo primario aparece rellena porque esa sigue siendo la referencia).
3. No olvides rellenar la celda de los años que hace que terminaste el MIR
4. En este trabajo el objetivo es alcanzar un consenso entre los endocrinólogos participantes de forma que nos pongamos de acuerdo en el índice de complejidad de cada ítem, siempre referido a una revisión de hipotiroidismo primario. Por ello te invito a comparar cada una de tus respuesta con la que ha dado el grupo, y considerar si, en aras del consenso, puedes acercarte a la opinión de grupo o incluso coincidir con él. En todo caso, siéntete libre de puntuar como consideres oportuno en cada uno de los ítems.
5. La idea es tener algo con lo que analizar nuestra actividad de consulta que vaya más allá que la clásica relación Nuevos/Sucesivas, y que se base en lo compleja que resulta la patología del paciente, entendiendo como compleja aquella que requiere más tiempo de consulta y/o más trabajo intelectual.
6. Aquellos diagnósticos que no veas nunca en consulta déjalos en blanco.
